# Supplementary material
Source: ML conference proceedings conference paper supplement (https://openaccess.thecvf.com/content/cvpr_2017/html/Upchurch_Deep_Feature_Interpolation_2017_CVPR_paper.html)
Supplement: Supplementary file 1 [file Upchurch_Deep_Feature_Interpolation_2017_CVPR_supplemental.pdf]

Archive with 1 entries (1 files):
- supplemental.pdf
